## Therapeutic inhibition of USP7-PTEN network in chronic lymphocytic leukemia: a strategy to overcome *TP53* mutated/deleted clones

Giovanna Carrà<sup>1</sup>, Cristina Panuzzo<sup>1</sup>, Davide Torti<sup>1,2</sup>, Guido Parvis<sup>2,3</sup>, Sabrina Crivellaro<sup>1</sup>, Ubaldo Familiari<sup>4</sup>, Marco Volante<sup>4,5</sup>, Deborah Morena<sup>5</sup>, Marcello Francesco Lingua<sup>5</sup>, Mara Brancaccio<sup>6</sup>, Angelo Guerrasio<sup>1</sup>, Pier Paolo Pandolfi<sup>7</sup>, Giuseppe Saglio<sup>1,2,3</sup>, Riccardo Taulli<sup>5</sup> and Alessandro Morotti<sup>1</sup>

<sup>1</sup> Department of Clinical and Biological Sciences, University of Turin, San Luigi Gonzaga Hospital, Orbassano, Italy

<sup>2</sup> Division of Internal Medicine - Hematology, San Luigi Gonzaga Hospital, Orbassano, Italy

<sup>3</sup> Division of Hematology, Azienda Ospedaliera, Mauriziano, Torino, Italy

<sup>4</sup> Division of Pathology, San Luigi Hospital, Orbassano, Italy

<sup>5</sup> Department of Oncology, University of Turin, San Luigi Gonzaga Hospital, Orbassano, Italy

<sup>6</sup> Department of Molecular Biotechnology and Health Sciences, University of Torino, Torino, Italy

<sup>7</sup> Cancer Genetics Program, Beth Israel Deaconess Cancer Center, Department of Medicine and Pathology, Beth Israel Deaconess Medical Center, Harvard Medical School, Boston, MA, USA

**Correspondence to:** Alessandro Morotti, **email:** alessandro.morotti@unito.it

Riccardo Taulli, **email:** riccardo.taulli@unito.it

**Keywords:** chronic lymphocytic leukemia, USP7, PTEN, miR181, miR338

**Received:** June 14, 2016

**Accepted:** February 20, 2017

**Published:** March 17, 2017

Copyright: Carrà et al. This is an open-access article distributed under the terms of the Creative Commons Attribution License (CC-BY), which permits unrestricted use, distribution, and reproduction in any medium, provided the original author and source are credited.

### ABSTRACT

**Chronic Lymphocytic Leukemia (CLL) is a lymphoproliferative disorder with either indolent or aggressive clinical course. Current treatment regimens have significantly improved the overall outcomes even if higher risk subgroups - those harboring *TP53* mutations or deletions of the short arm of chromosome 17 (del17p) - remain highly challenging. In the present work, we identified USP7, a known de-ubiquitinase with multiple roles in cellular homeostasis, as a potential therapeutic target in CLL. We demonstrated that in primary CLL samples and in CLL cell lines USP7 is: *i*) over-expressed through a mechanism involving miR-338-3p and miR-181b deregulation; *ii*) functionally activated by Casein Kinase 2 (CK2), an upstream interactor known to be deregulated in CLL; *iii*) effectively targeted by the USP7 inhibitor P5091. Treatment of primary CLL samples and cell lines with P5091 induces cell growth arrest and apoptosis, through the restoration of PTEN nuclear pool, both in *TP53*-wild type and -null environment. Importantly, PTEN acts as the main tumor suppressive mediator along the USP7-PTEN axis in a p53 dispensable manner. In conclusion, we propose USP7 as a new druggable target in CLL.**

### INTRODUCTION

Chronic lymphocytic leukemia (CLL) is a lymphoproliferative disorder with either an indolent clinical course and long survival time or aggressive behavior in a smaller proportion of cases [1-6]. Standard immuno-chemotherapy regimens achieve a 60-70% overall response rate, with only a fraction of treated

patients obtaining a complete hematological remission, while the median time to treatment failure is around 18-20 months. Unsatisfactory therapeutic options still exist for higher risk groups, and in particular those harboring *TP53* mutations or deletion of the short arm of chromosome 17 (del17p) [7, 8]. In addition to chemotherapy and anti-CD20 immunotherapy, molecular insights into CLL pathogenesis and maintenance allowed

to identify novel drugs to target a variety of signaling routes to enter the clinical arena [9]. These include PI3K inhibitors (e.g. *idelalisib*) [10], BTK inhibitors (*ibrutinib*, *acalabrutinib*) [11, 12] and BCL2 inhibitors (*venetoclax*, *navitoclax*) [13, 14]. *Del17p* has been reported to be present in ~7% of chemo-naïve CLL cases and 20-40% of relapsed patients and is routinely used as a prognostic marker, representing the sub-population facing an unmet clinical need. Furthermore, *idelalisib* (*Zydelig*) [15] and *ibrutinib* (*Imbruvica*) [16] have been FDA-licensed for CLL harboring *del17p* following optimistic results in randomized controlled trials. Some of these drugs are directed to PI3K pathway suggesting its essential role for the maintenance of CLL malignant phenotype irrespective of *TP53* status.

Recently, Chauhan *et al.* showed that pharmacological inhibition of the de-ubiquitinase USP7 strongly induces apoptosis in multiple myeloma cells resistant to conventional and bortezomib-based therapies [17]. USP7 promotes the de-ubiquitination of various targets with consequent changes in their protein levels and cellular compartmentalization and behaves as a central rheostat in the definition of cell survival. USP7 plays an essential role in tumorigenesis through the inactivation of three major tumor suppressors: p53 [18], PTEN [19, 20] and FoxO [21]. By affecting either their cellular compartmentalization or adjusting their protein levels, USP7 influences the cellular fate, balancing survival and cell death. Both p53 [22] and PTEN [23-28] are known to play important tumor suppressive roles in CLL pathogenesis. In particular, while *TP53* is in most cases genetically inactivated through point mutations or deletion and correlates with resistance to standard treatments and poor prognosis, PTEN has been shown to be functionally inactivated through tail-phosphorylation by the CLL relevant Protein Kinase 2 (CK2) [26, 27, 29, 30]. Here we investigate the mechanisms of USP7 regulation in CLL, explore the functional role of USP7 in the broader context of its signaling partners (i.e. the USP7-PTEN network) and provide evidences supporting its potential therapeutic exploitation. Finally, we discuss the ability of USP7 inhibitor to effectively target CLL cells regardless of their *TP53* status.

## RESULTS

### USP7 is strongly up-regulated in CLL samples

To assess the levels of expression of *USP7* in CLL, real-time PCR was performed on mRNA isolated from primary CD19<sup>+</sup> lymphocytes of CLL patients and healthy individuals. As reported in Figure 1A, *USP7* mRNA is markedly up-regulated in CLL. Similarly, using protein extracts from primary CD19<sup>+</sup> lymphocytes of

CLL patients and representative healthy individuals, we observed significantly increased levels of USP7 in CLL samples when compared to normal cells (Figure 1B). Most CLL patients showed a USP7/GAPDH ratio higher than normal CD19<sup>+</sup> lymphocytes, indicating that USP7 was generally over-represented in CLL (Figure 1C). The biological features of enrolled patients were reported in Supplementary Table 1. USP7 is expressed both in the nucleus and in the cytoplasm of representative primary CLL samples and CLL cell lines, MEC-1 and EHEB (Figure 1D), as observed in other cellular models [31-34]. Immunohistochemical analysis showed a strong positivity for USP7 in 3 out of 5 CLL samples when compared to normal lymphocytes in normal bone marrow specimens (Figure 1E). Finally, we analyzed *USP7* expression levels in a publicly available larger cohort of CLL patients (*n* = 217) and 12 normal samples [35]. Also in this case, USP7 was over-expressed in CLL when compared to normal samples (Figure 1F). Although this cohort included only patients with stage A of the Binet classification (i.e. limited-stage disease), USP7 overexpression in CLL is highly significant and therefore these data suggest that its overexpression may represent a common feature even at the early stages of the disease. Altogether these data provide a rationale to investigate USP7 as a target in CLL.

### USP7 is regulated at post-transcriptional and post-translational levels

Prior to investigate USP7 as a potential therapeutic target in CLL, we sought to assess the mechanisms of USP7 overexpression and activation in CLL. Micro-RNAs (miRNAs) have been reported as functional players in CLL pathogenesis with prognostic significance [36]. Therefore, we performed a bioinformatic survey of publicly available datasets [35] returning a list of miRNAs potentially able to target the USP7 3'-UTR (Supplementary Figure S1A). The calculated Pearson correlation coefficient was highly significant for an inverse correlation between USP7 and miR-338-3p and miR-181b (Supplementary Figure S1B and S1C). Thereby, we firstly subcloned the miR-338-3p responsive element (MRE) of *USP7* (Supplementary Figure S1D, upper panel) downstream to a luciferase construct and a reporter assay showed that miR-338-3p could directly down-regulate USP7 at post-transcriptional level (Supplementary Figure S1D, lower panel). Similar data were obtained with miR-181b response element (Supplementary Figure S1E upper and lower panel). Accordingly, miR-338-3p transfection strongly reduced *USP7* levels (Supplementary Figure S1F). We provide the *in vitro* proof of principle that USP7 overexpression in CLL may be sustained through miRNA deregulation, and in particular by miR-338-3p and miR-181b. Interestingly, miR-181b was already shown to be down-regulated in CLL and to play a role in CLL pathogenesis through the regulation of the oncogene *Tcl1* [37, 38]. Further analyses

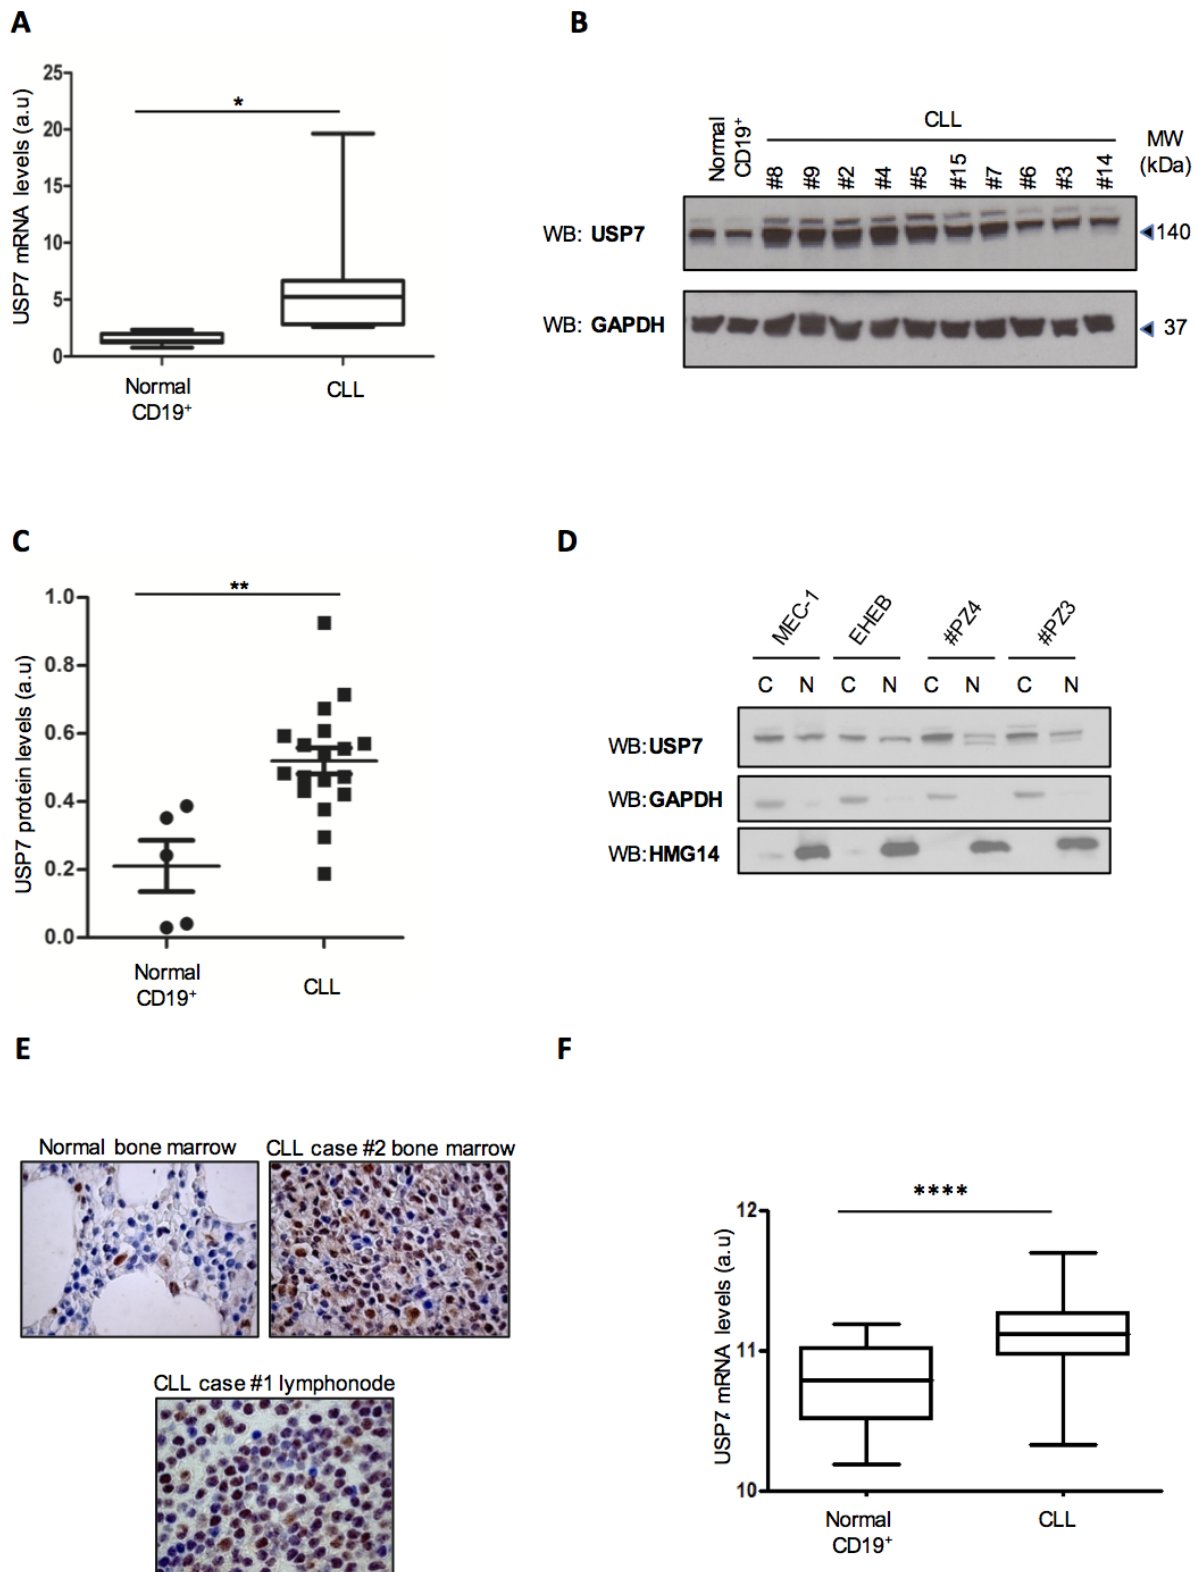

**Figure 1: USP7 is strongly up-regulated in CLL samples.** **A.** Quantification of mRNA levels in 5 normal CD19<sup>+</sup> lymphocytes and 19 CLL samples. \**p* < 0.05. **B.** Primary CD19<sup>+</sup> lymphocytes from two representative normal individuals and ten CLL patients were analyzed for USP7 protein expression. **C.** Quantification of USP7/GAPDH ratio in 5 normal CD19<sup>+</sup> lymphocytes and 19 CLL samples. \*\**p* < 0.01. **D.** Western Immunoblot of cytoplasm/nuclear fractions in CLL cell lines model and two representative primary CLL samples. **E.** USP7 immunohistochemical of human biopsies in one representative normal bone marrow and two CLL specimens. **F.** Box-plot of USP7 mRNA levels in normal lymphocytes (*n* = 12) compared to CLL primary cells (*n* = 217). \*\*\*\**p* < 0.0001.

are however mandatory to assess the role of miR-338-3p and miR-181b in the setting of larger CLL cohorts, to better correlate their expressions with clinical outcomes and biological characteristics.

Next, we studied USP7 post-translational modifications. In particular, it was already demonstrated that Protein Casein Kinase 2 (CK2) phosphorylates USP7 on serine 18 residue with consequent regulation of protein stability and activation [33].

Despite several USP7 isoforms have been predicted (<https://www.ncbi.nlm.nih.gov/gene/7874>) (Figure 2A), only USP7 isoform 1 contains serine 18. Due to the relevant biological role of CK2 in CLL pathogenesis [26, 27, 29, 39-43], we sought to investigate whether CK2 is involved in modulating USP7 activity in this disease. We first investigated the levels of USP7 isoforms in primary CLL samples. Unfortunately, we were not able to specifically detect isoform 2. Interestingly, isoform 1 was the most represented variant in CLL primary samples (Figure 2B) and in MEC-1 and EHEB CLL cell lines (Figure 2C and Supplementary Figure S2A). In line with previous results [33], we observed that USP7 is phosphorylated on Ser18 residue in the EHEB and MEC-1 cell lines and phosphorylation was reverted by CK2-inhibitor treatment (Supplementary Figure S2B). Notably, CK2 inhibitor treatment did not affect total USP7 mRNA levels (Supplementary Figure S2C) but, as observed elsewhere [33], a prolonged treatment with 25  $\mu$ M TBB for 72 hours was associated with USP7 protein reduction (Supplementary Figure S2D). Since these cells expressed mostly USP7 isoform 1, the one with serine 18, these data suggest that CK2 promotes USP7 stabilization in CLL context, through phosphorylation. On the contrary, CK2 inhibitors did not change the localization of USP7 (Supplementary Figure S2E). A kinase assay of purified USP7 incubated in the presence of CK2 confirmed that CK2 phosphorylates USP7 (Figure 2D). Finally, also phospho-Serine-18 specific antibody demonstrates that USP7 is highly phosphorylated on this residue in primary CLL samples (Figure 2E). Overall, our data show that USP7 overexpression may be correlated to miRNAs deregulation and that USP7 is functionally under the upstream control of CK2, thus enforcing the functional role of USP7 in CLL.

### Targeting USP7 induces growth inhibition and apoptosis in CLL cell lines

Recently a few inhibitors have been developed to specifically target USP7 with promising results in different cancer models [17, 44-50]. USP7 inhibitor P5091 was shown to exhibit impressive properties for the treatment of Multiple Myeloma (MM) [17]. To explore the potential therapeutic role of USP7 inhibition in CLL, we treated the *TP53*-mutated CLL cell line MEC-1 with P5091.

P5091 treatment was associated with: i) dose-dependent reduction of cell viability *via* p21 at a concentration as low as 1  $\mu$ M (Figure 3A, left panel and insert) through MDM2 (Supplementary Figure S3A and S3B), with a similar mechanism as described previously [17]; ii) accumulation in the G2/M phase of the cell cycle (Figure 3B); iii) inhibition of anchorage-independent growth (Figure 3C, upper panel and lower panel) and iv) activation of the apoptotic pathway as indicated by the proteolytic cleavage of Caspase 3 (Figure 3D upper and lower panel). Similar results were obtained also in the *TP53*-wild type EHEB CLL cell line (Supplementary Figure S4A and S4B). Interestingly, both *TP53*-mutated MEC-1 and *TP53* wild-type EHEB displayed a similar P5091 IC<sub>50</sub> (MEC-1 1.3  $\mu$ M; EHEB 2  $\mu$ M), implying a similar p53-independent “response phenotype” (Supplementary Figure S4C). Notably, despite being characterized by *TP53* deletion, MEC-1 cells were highly responsive to P5091, suggesting that USP7 inhibition can overcome *TP53* deletion-related resistance to apoptosis. P5091 treatment did not affect p53 targets in MEC1 cell line (Supplementary Figure S5A) and PTEN levels did not change (Supplementary Figure S5B).

To verify the specificity of the USP7 inhibitor, we then used a pool of 5 different siRNAs able to efficiently silence USP7 (Supplementary Figure S6A). USP7 silencing in MEC-1 cells (Figure 3E and Supplementary Figure S6B) abrogated cell growth, corroborating the *bona fide* data we obtained with the inhibitor. Consistently, USP7 silencing promoted MEC-1 apoptosis (Figure 3F). Collectively, these data demonstrate that USP7 targeting through small molecule inhibition is highly effective in CLL cell lines.

Lastly, we assessed whether P5091 treatment synergized with one of the recently approved drugs, idelalisib [15, 51]. We performed proliferation and apoptosis assays using MEC-1 and EHEB cell lines. Interestingly, combined treatment of MEC-1 and EHEB cell lines with the PI3K-delta and USP7 inhibitors synergistically inhibits proliferation and promotes apoptosis induction (Supplementary Figure S7A-S7F). These results suggest that USP7 inhibition may impact on pathways that may be PI3K/AKT dependent.

### USP7 inhibition affects PTEN delocalization

USP7 is a de-ubiquitinase that targets three major tumor suppressors: p53 [18], PTEN [19, 20] and FoxOs [52]. USP7 promotes the deubiquitination of: i) p53, increasing its stability *via* MDM2; ii) PTEN, favoring its shuttling from the nucleus into the cytoplasm; iii) FOXOs, favoring changes in cellular compartmentalization. By changing tumor suppressors' cellular compartmentalization and protein levels, USP7 plays an essential and direct role in tumorigenesis, while its inhibition offers the challenging therapeutic options to reactivate tumor suppressive functions and trigger

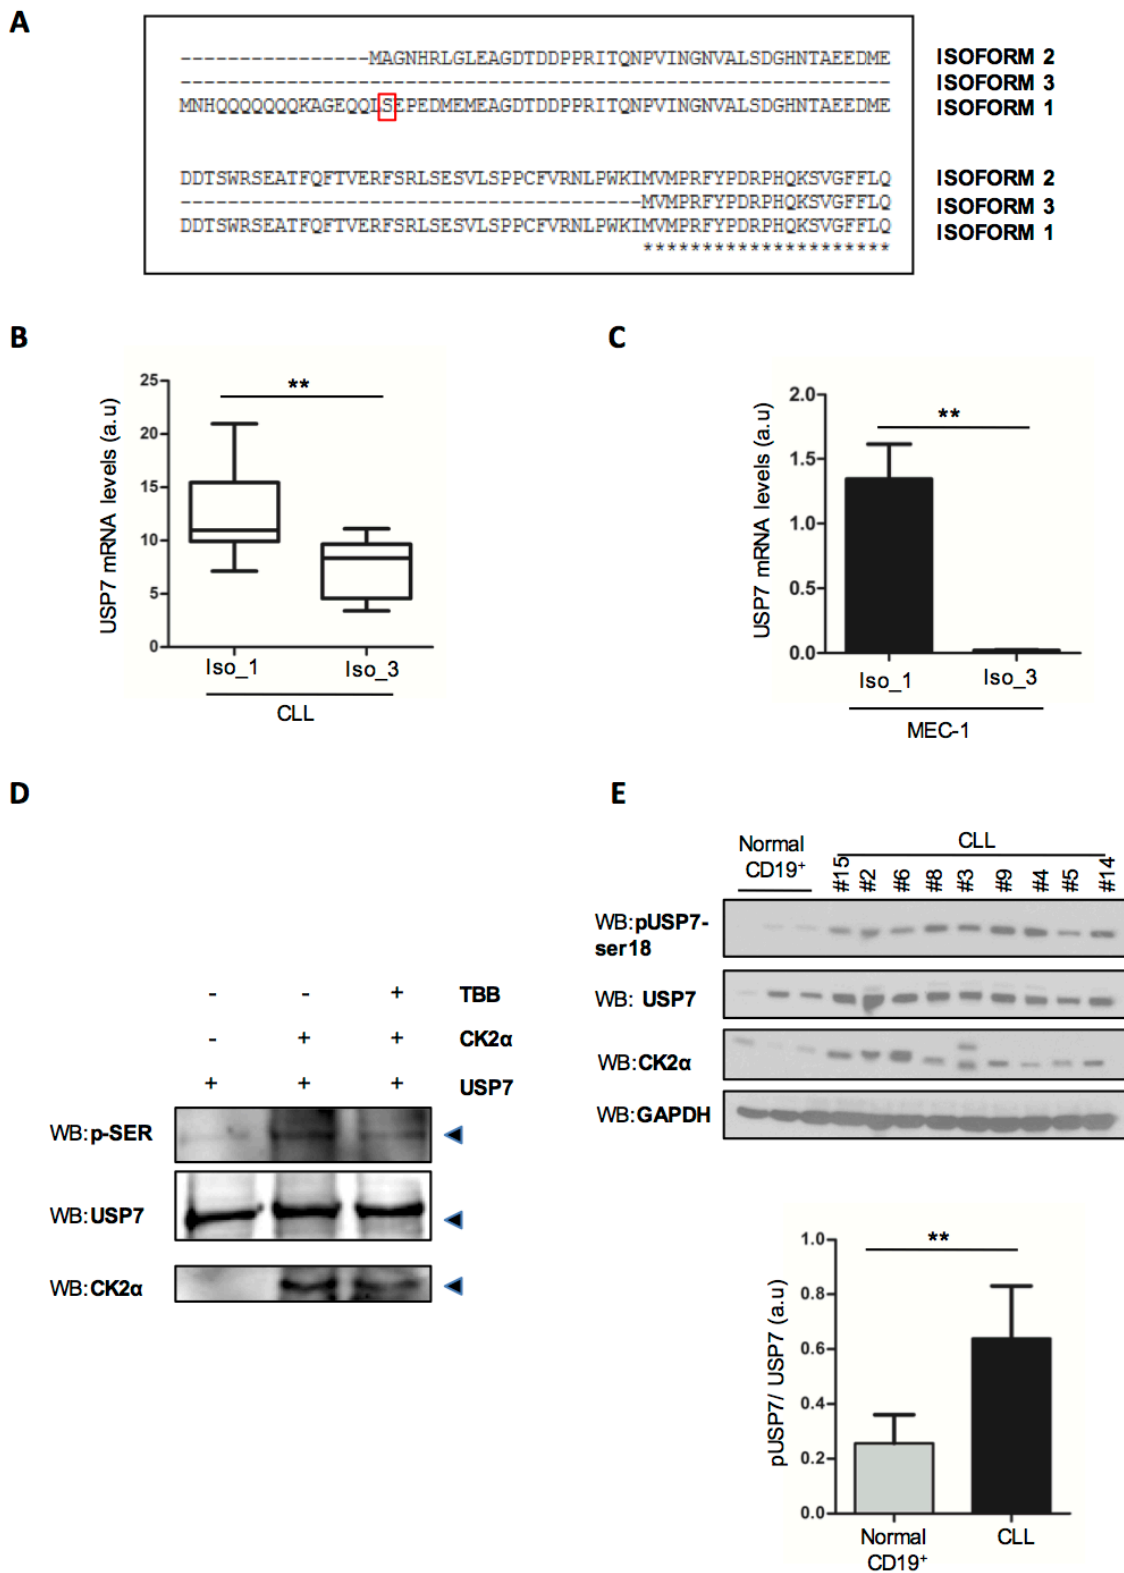

**Figure 2: USP7 Post-translational modifications in CLL.** A. Representation of USP7 isoforms segments highlighting the only isoform containing serine-18. B. Quantification of USP7 isoform 1 (Iso\_1) and isoform 3 (Iso\_3) mRNA levels in CD19<sup>+</sup> lymphocytes from 19 CLL samples.  $**p < 0.01$ . C. Quantification of USP7 isoform 1 and 3 mRNA levels in MEC-1 cells.  $**p < 0.01$ . D. Kinase assay with purified USP7 protein and immunoprecipitated CK2. The assay was performed in the absence or presence of 60  $\mu$ M TBB. p-SER: phosphoserine. E. Upper panel: Purified tumor cells from normal CD19<sup>+</sup> and CLL patients were analyzed for the indicated proteins. Lower panel: quantification of pSer18 USP7 expression level, normalized on total USP7.  $**p < 0.01$ .

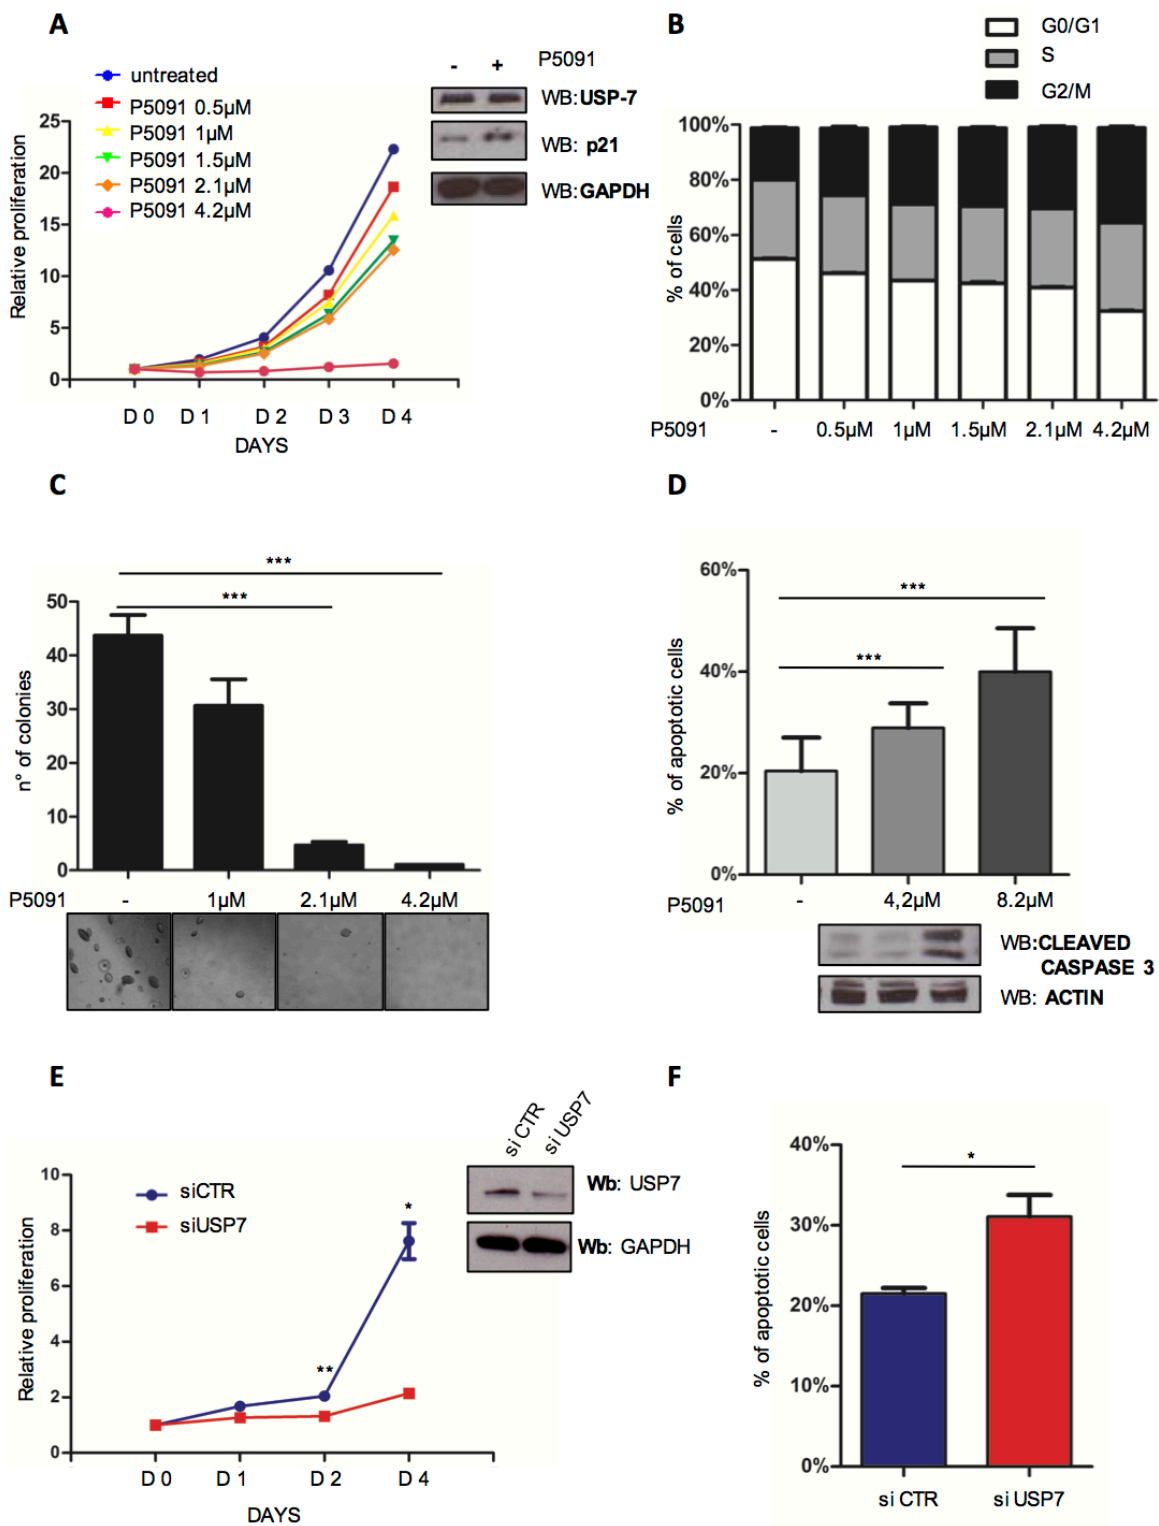

**Figure 3: Targeting USP7 induces growth inhibition and apoptosis in CLL cell lines.** **A.** Proliferation analysis of MEC-1 cells treated with USP7 inhibitor (P5091) for the indicated times and concentrations. The number of cells at day 0 was set at 1 unit. Insert: lysates from control and P5091-treated MEC-1 cells were analyzed for p21 expression level. **B.** Cell cycle distribution of MEC-1 cells treated or not with P5091 for 3 days. **C.** Quantification and representative images of soft-agar growth assay in MEC-1 cells treated with the indicated concentrations of P5091 for 15 days.  $***p < 0.001$ . **D.** Upper panel: evaluation of apoptosis in MEC-1 cells treated with the indicated concentrations of P5091 for 24 hrs.  $***p < 0.001$ . Lower panel: cleaved-caspase-3 Western Immunoblot in the same conditions. **E.** Proliferation analysis in MEC-1 cells infected either with control (siCTR) or USP7-directed (siUSP7) siRNAs (insert).  $*p < 0.05$ ;  $**p < 0.01$ . **F.** Apoptosis analysis of MEC-1 cells described in E.  $*p < 0.05$ .

cancer selective apoptotic response. Our observation that P5091 markedly promoted apoptosis in *TP53*-mutated MEC-1 cells suggests that P5091 effects are p53-independent in CLL. Since we previously demonstrated that USP7 plays an essential role in the regulation of

PTEN compartmentalization in CML [20, 34], we sought to investigate whether USP7 functionally inactivates PTEN in CLL through PTEN nuclear exclusion. PTEN plays a role in CLL pathogenesis where it is not mutated/deleted [25] but functionally inhibited. Therefore, we

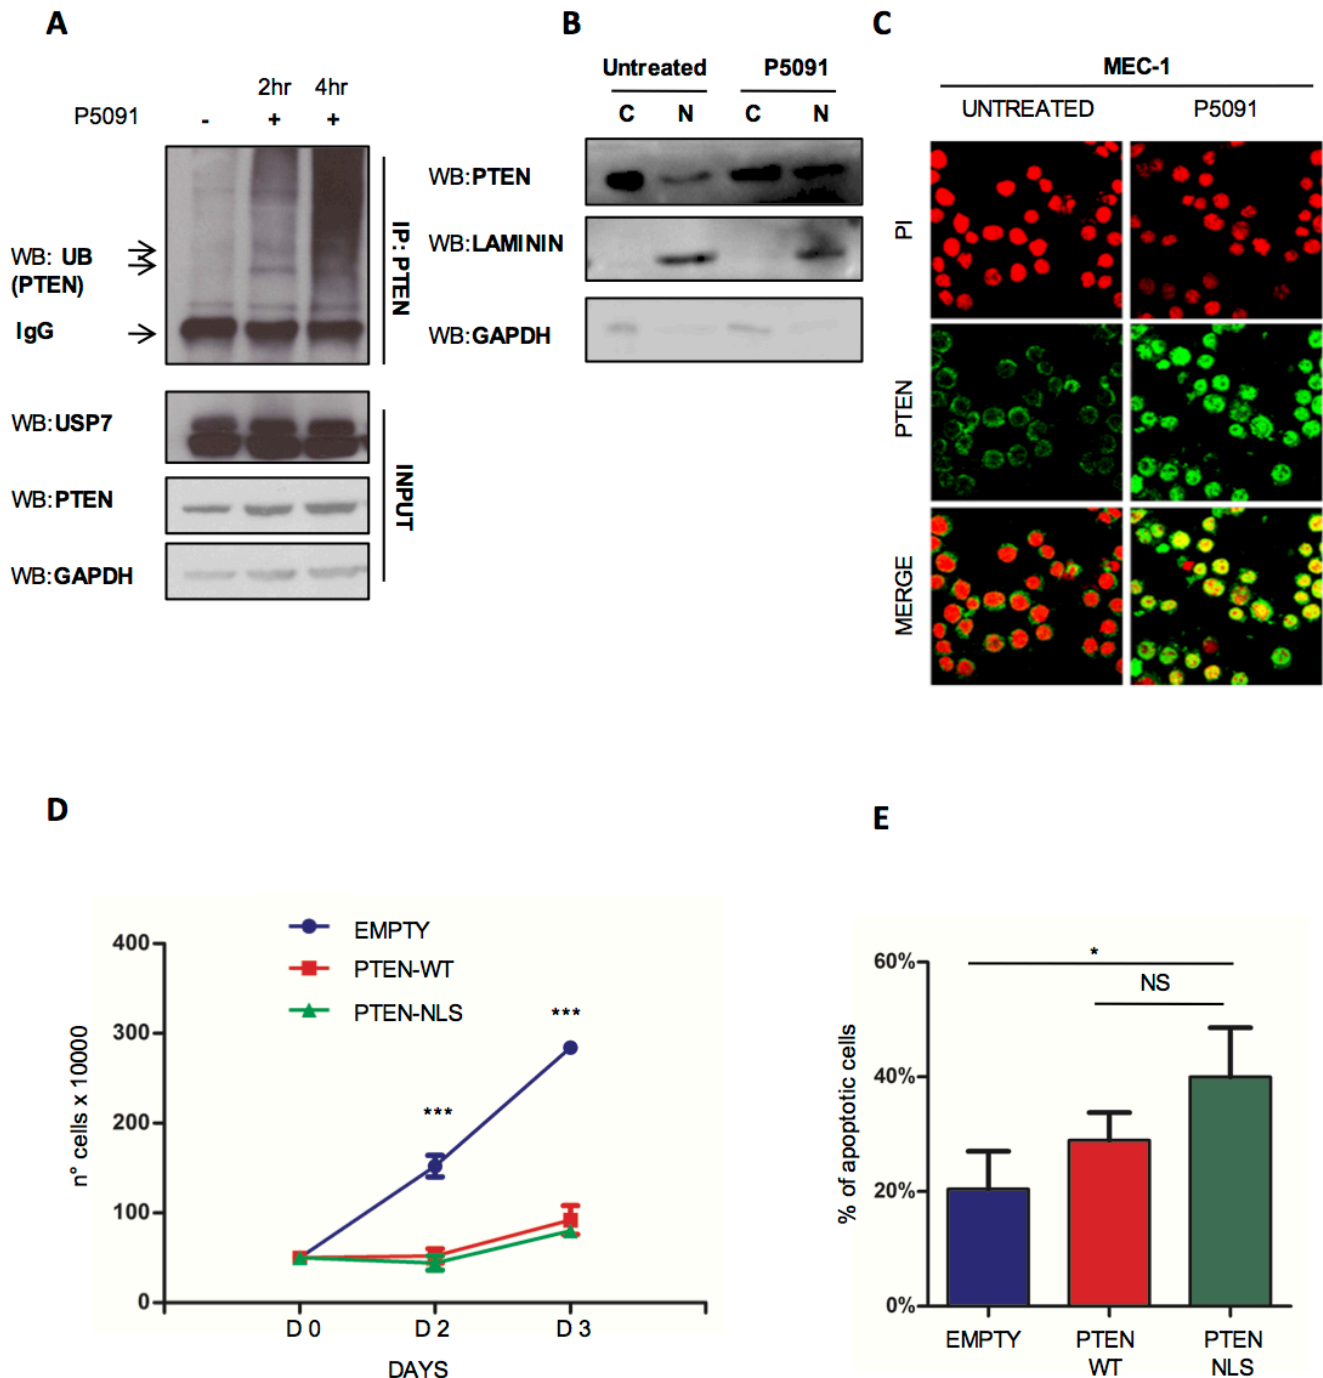

**Figure 4: USP7 inhibition affects PTEN delocalization.** **A.** PTEN-ubiquitination assay in MEC-1 cells treated with 16  $\mu$ M P5091 for 2 and 4 hours. **B.** USP7 Western Immunoblot upon cytosol/nuclear fractionation of MEC-1 cells treated with P5091 at a concentration of 16  $\mu$ M for 2 and 4 hours. **C.** Immunofluorescence assay showing PTEN cellular compartmentalization in MEC-1 cells treated with 4.2  $\mu$ M P5091 for 24 hours. Anti-PTEN antibody (green); Propidium iodide (red). **D.** Proliferation analysis of MEC-1 cells expressing GFP-PTEN-WT and GFP-PTEN-NLS. Cell growth was quantified by counting cells with trypan blue exclusion of dead cells at each time point. \*\*\* $p < 0.001$ . **E.** Percentage of apoptosis in GFP-PTEN transfected MEC-1 cells. \* $p < 0.05$ .

speculated that USP7 inhibition may promote PTEN reactivation and consequently cancer selective apoptotic induction, without affecting normal cells. PTEN is an essential tumor suppressor implicated in tumorigenesis through either phosphatase dependent and independent functions [53]. In particular, it is involved in the negative regulation of the PI3K-AKT signaling, a major pathway responsible to CLL maintenance, and acts in the nucleus where it regulates proliferation [54] and genomic stability [55, 56]. As shown in Figure 4A, treatment with USP7 inhibitor restored PTEN endogenous ubiquitination levels. Therefore, P5091 promoted PTEN re-localization into the nucleus, as detected by cell fractionation (Figure 4B) and immunofluorescence (Figure 4C) of MEC-1 cell line, but did not change PTEN protein levels (Supplementary Figure S5B). Also, the inhibition of the USP7 upstream regulator CK2 with TBB promoted PTEN shuttling, therefore indicating that CK2/USP7/PTEN forms an important network in CLL cells (Supplementary Figure S8A). To confirm the tumor suppressive role of nuclear PTEN in CLL cells, we forced PTEN expression into the nucleus upon transfection with a Nuclear Localization Signal (NLS)-bearing PTEN construct. Nuclear PTEN expression was associated with growth arrest (Figure 4D) and apoptosis induction (Figure 4E), suggesting that PTEN acts as a potent tumor suppressor in CLL. Our data demonstrate that USP7 is responsible for PTEN nuclear exclusion with consequent impairment of its tumor suppressive functions and that USP7 inhibition restores PTEN nuclear pool and its oncosuppressive activity in the context of CLL.

### **P5091 affects USP7/PTEN network in primary CLL samples**

We evaluated PTEN cellular compartmentalization in primary CLL samples by immunofluorescence and western immunoblot upon nuclear/cytoplasmic fractionation. Interestingly, normal CD19<sup>+</sup> lymphocytes displayed a physiological localization of PTEN both in the nucleus and the cytosol (which we refer to as a “diffuse pattern”), while most of CLL CD19<sup>+</sup> lymphocytes were characterized by PTEN nuclear exclusion (from an exclusively “cytosolic” PTEN to a “predominantly cytosolic” compartmentalization of PTEN) (Figure 5A and Supplementary Figure S9A). Although few cells in the control group may display cytosolic expression of PTEN, a fact recalling a physiological degree of dynamic regulation, the overall statistics across CLL lymphocytes clearly showed a major unbalance of the PTEN pool toward the cytoplasm (Figure 5B). This latter result confirms the relevance of these findings in human disease. To corroborate the results in CLL cells lines, we decided to test the impact of P5091 in CLL samples. Also in primary cells, P5091 treatment strongly promoted apoptosis (Figure 5C and Supplementary Figure S9B) while

B-lymphocytes from normal individuals were unaffected. Only higher concentrations of P5091 (16  $\mu$ M) decrease the viability of normal lymphocytes (Supplementary Figure S9C), suggesting a potential selectivity of the therapy. Strikingly, three *TP53* deleted CLL samples were equally subjected to P5091 apoptosis induction, confirming that USP7 inhibitor acts in a p53-independent manner. Moreover, USP7 inhibitor treatment of primary CLL was associated with increased ubiquitination of endogenous PTEN and consequently PTEN re-localization into the nucleus (Figure 5D and 5E). These data demonstrated a potent activity of P5091 against primary CLL cells.

## **DISCUSSION**

Several effective drugs for the treatment of CLL have been recently licensed while others are in advanced phases of clinical development. Notwithstanding, the effective treatment of *TP53* mutated or deleted (del17p) CLL patients remains challenging. *TP53* mutations/deletions are involved in CLL transformation into a more aggressive disease (i.e. Richter syndrome) and may reside in dormant clones in the very early stages of the disease [57]. Indeed, treatments exert a selective pressure favoring the expansion of *TP53*-mutated/deleted clones; despite *TP53* restoration in tumors affects cancer maintenance, no specific therapies have been developed to effectively overcome *TP53* mutated tumors.

Overall, in this study we utilized CLL cell lines and primary tumor cells as models to investigate the USP7 role in CLL and to demonstrate the efficacy of a small molecule inhibitor P5091, in this disease. As summarized in Figure 5F, our data show that the de-ubiquitinase USP7 is aberrantly expressed in CLL. USP7 is over-expressed in about 70% of CLL CD19<sup>+</sup> lymphocytes, both at the mRNA and protein levels. This observation has been originally made using our (single) institute cohort of CLL patients and extended within a previously published mRNA expression dataset counting 217 CLL cases [35]. It should be questioned that this cohort included only patients in the Binet A CLL stage, which represents the early stage of the disease. However, it should be considered that in other cancer types USP7 over-expression has been commonly correlated with both disease progression and advanced stages, therefore suggesting that USP7 over-expression in CLL may play a pathogenetic role even in the early stages of this disease.

Following identification of USP7 aberrant expression in CLL primary cells, we investigated the mechanisms responsible to its deregulation. High USP7 expression appeared to be a consequence of deregulated miRNA expression and/or post-translational regulation by CK2, an aberrantly expressed serine-kinase in CLL. miRNA expression profiling revealed that miR-338-3p and miR-181b anticorrelate with USP7 in CLL samples and *in vitro* experiments confirmed their direct interaction



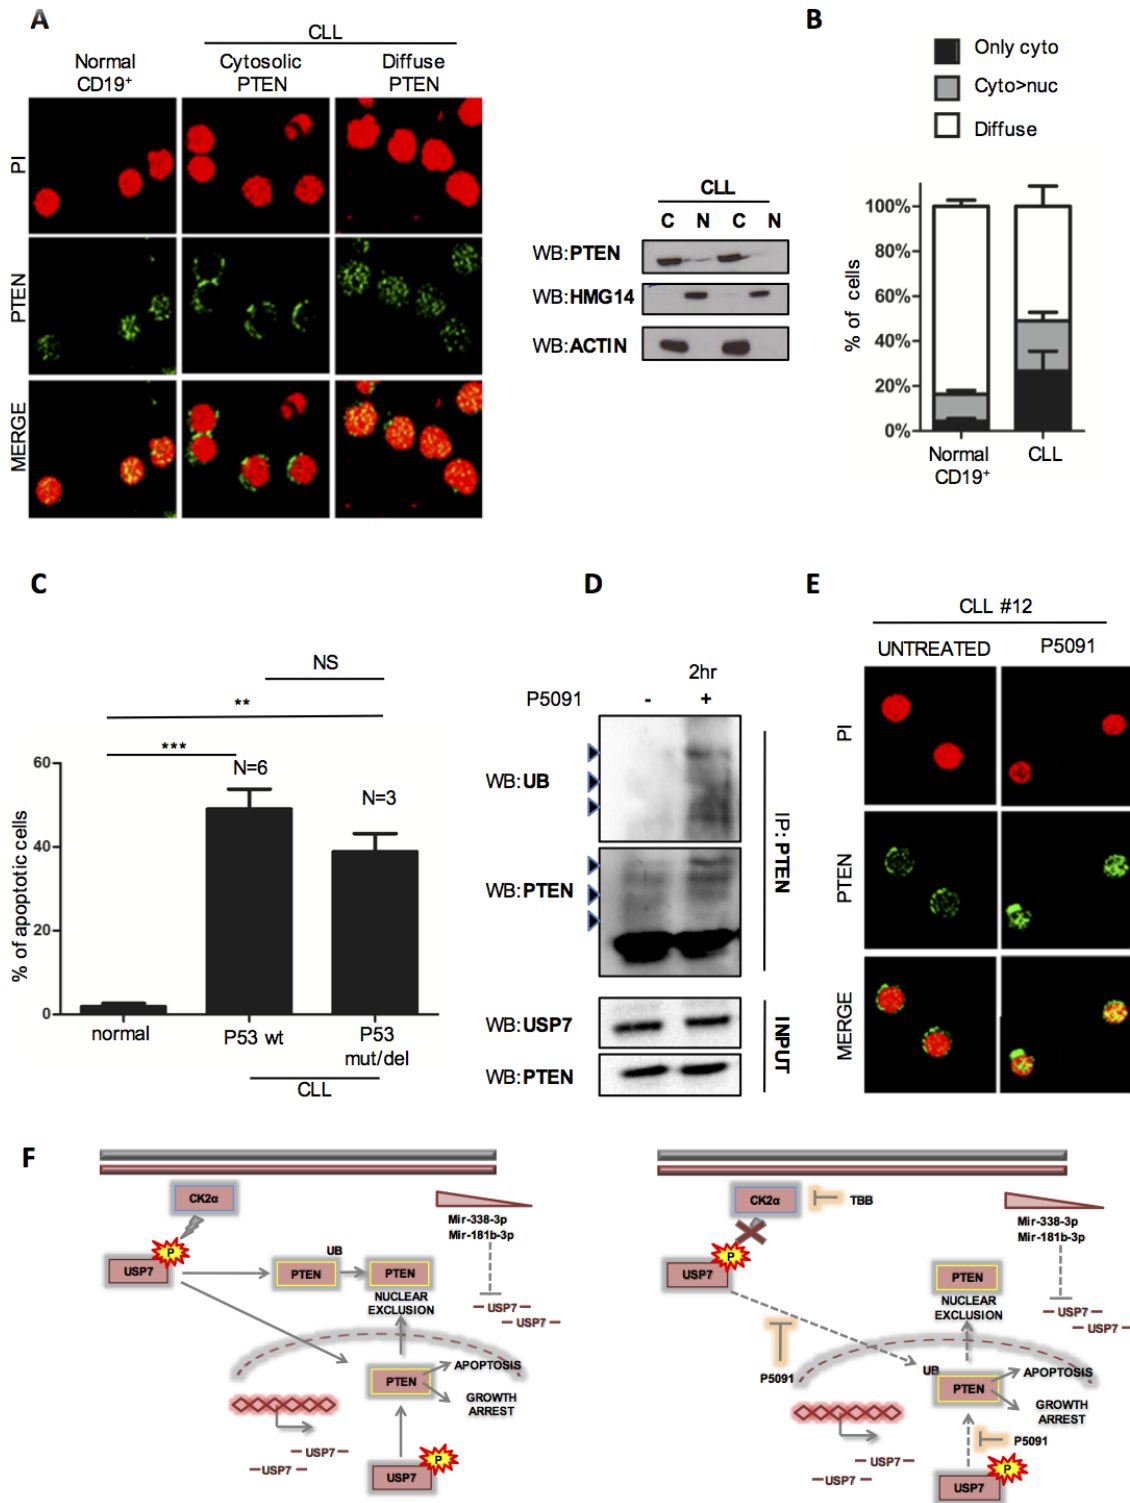

**Figure 5: P5091 affects USP7/PTEN network also in primary CLL samples.** **A.** Left panel: Representative immunofluorescence images on CD19<sup>+</sup> lymphocytes from peripheral blood of normal and CLL individuals, stained with anti-PTEN antibody (green) and Propidium iodide (red). Right panel: Western Immunoblot of cytoplasm/nuclear fractions in two representative primary CLL samples. **B.** Quantification of PTEN cellular compartmentalization in CD19<sup>+</sup> lymphocytes from 5 normal and 14 CLL samples. Data represent mean  $\pm$ SD of > 50 cells analyzed from each sample and expressed as percentage. **C.** Apoptosis analysis of CD19<sup>+</sup> lymphocytes from normal ( $n = 3$ ) and CLL ( $n = 9$ ) individuals treated with P5091 for 24 hours. Percentage of each sample was normalized to corresponding untreated condition.  $***p < 0.001$ . **D.** PTEN ubiquitylation assay in CLL primary cells treated with DMSO or P5091 (16  $\mu$ M) for 2 hours. **E.** PTEN cellular compartmentalization (green) in a representative PTEN nuclear-excluded CLL sample before and after treatment with P5091 (4.2  $\mu$ M) for 24 hours. **F.** Model of USP7 network in CLL.

with the 3'UTR of the gene. Unluckily, due to the inability to demonstrate miR-338-3p down-expression in CLL samples *versus* normal individuals in this dataset, its real role in CLL pathogenesis requires further investigations. It could be speculated that the contribution of miR-338-3p in USP7 regulation is different in CLL respect to normal lymphocytes or that miR-338-3p is involved in CLL pathogenesis through different mechanisms. Conversely, miR-181b is already known to be downregulated in CLL and to play a key role in CLL pathogenesis [37, 38]. While further analyses are mandatory to dissect the role of these miRNAs in the regulation of USP7 in CLL, our data clearly confirmed that CK2-mediated USP7 phosphorylation enhances its de-ubiquitinase activity in CLL. More precisely, we found that CLL samples mostly expressed the serine-18 USP7 isoform and that CK2-mediated phosphorylation plays a key role in the regulation of USP7 activity and consequently of its targets, as demonstrated elsewhere [33]. While further analyses should be performed to better dissect the CK2/USP7/PTEN network, due to the ability of CK2 to activate USP7 as a deubiquitinase and to directly promote PTEN tail phosphorylation, these findings provided the rationale for the evaluation of USP7 inhibitor in CLL and therefore we focused on anti-tumor activity of its inhibitor, P5091. We showed that treatment with low concentrations of the USP7 inhibitor selectively induces apoptosis of MEC-1 and EHEB CLL cell lines and primary CLL CD19<sup>+</sup> lymphocytes, while maintaining unaffected CD19<sup>+</sup> lymphocytes from normal individuals. P5091 treatment effectively induces apoptosis in both *TP53*-mutated MEC-1 and *TP53*-wild-type EHEB cell lines and, remarkably, is highly effective in del17p CLL primary CD19<sup>+</sup> lymphocytes, with an apoptotic induction 'potency' like the one observed in *TP53*-wild type CLL samples.

To better evaluate the mechanisms of USP7 anti-leukemic properties in *TP53*-wild-type and mutated CLL, we then analyzed USP7 targets in this specific context. USP7 was originally studied as a gene able to regulate p53 through a complex MDM2/p53 network. It also targets two major tumor suppressors: PTEN and FoxO(s). Specifically, USP7 induces the de-(mono)-ubiquitination of PTEN and FoxO, promoting their nuclear exclusion; on the contrary, mono-ubiquitination favors an enrichment of the nuclear pool. Nuclear PTEN targets cell cycle [54] and the machinery that regulates genomic stability [55, 56], thus protecting genomic integrity. PTEN was described as a functionally inactive tumor suppressor in CLL. Notably, no genetic alterations of PTEN have been reported in CLL, suggesting that therapies that promote PTEN reactivation may effectively target CLL cells.

In line with these considerations, we have here observed that USP7 promotes PTEN delocalization in CLL samples, favoring the loss of its nuclear tumor suppressive functions. Conversely, USP7 inhibition is associated with the restoration of the PTEN nuclear pool and correlates with apoptosis induction and cell growth

arrest. The functional reactivation of tumor suppressor PTEN can indeed by-pass the apoptotic resistance of *TP53* mutated cells/clones.

While USP7 involvement in tumorigenesis should be further investigated (e.g. in deep studying USP7 targeting miRNA(s) and regulation of CK2 enzymatic activity), our data attribute to USP7 inhibitors a therapeutic role in CLL precision medicine, functioning through the reactivation of the tumor suppressor PTEN. In doing that, USP7 inhibitor P5091 activates an apoptotic and cell growth arrest response which occurs by-passing *TP53* genetic loss.

## MATERIALS AND METHODS

### Cells and primary human samples

Human samples were collected from  $n = 20$  untreated CLL patients at the San Luigi Hospital (Orbassano, Italy), following informed consent and with obscured identity; CD19<sup>+</sup> lymphocytes were isolated from healthy donors ( $n = 5$ ) accordingly to the MiltenyiBiotec protocol (MiltenyiBiotec, #130-050-301). The project was reviewed and approved by the institutional ethical committee (code #10/2013). Human MEC-1 cell line was gently provided by Prof. Deaglio (University of Turin) and was grown in IMDM medium (Life Technologies) containing 10% heat-inactivated fetal bovine serum (FBS, Sigma Aldrich), supplemented with 2 mM L-glutamine, 100 U/ml penicillin, and 0.1 mg/ml streptomycin and maintained at 37°C in a 5% CO<sub>2</sub> humidified atmosphere. EHEB cell line was purchased from DSMZ and was maintained in RPMI 10% FBS. The lymphoid nature of this cell line was authenticated by flow-cytometry (CD19<sup>+</sup> positivity).

*TP53* status of MEC-1 and EHEB was previously investigated [58]. HEK293T cells were obtained from ATCC and were maintained in DMEM supplemented with 10% FBS. Cell lines were regularly tested with MycoAlert (Lonza) to ascertain that cells were not infected with mycoplasma.

### Plasmids, silencing and nucleofection

GFP and PTEN constructs were described elsewhere [20, 59]. Specific USP7 siRNA was purchased from Sigma-Aldrich (EHU-1311171). Negative Control siRNA from Ambion (Cat#4611G) was used as a control. For the transient transfection  $1.5 \times 10^6$  MEC-1 cells were pelleted and resuspended in 100µl of Nucleofector solution (Lonza), according to the manufacturer's protocol. For each nucleofection, 2 µg of plasmid vectors or 30 nM of siRNAs were placed in the cuvette. pMaxGFP® (Lonza) was used to evaluate transfection efficiency. Nucleofection

was done using program V-001 or U-015 on the Shuttle System. After nucleofection, the content of each cuvette was dispersed as rapidly as possible with 500  $\mu$ l of the pre-equilibrated culture medium and transferred into a 12-wells plate. Twenty-four hours after transfection experiments were performed.

### Luciferase reporter assays

100 ng of luciferase plasmids (psiCHECKTM-2) encoding wild-type or mutant 3'UTR of USP7 were co-transfected with synthetic pre-miRNA (hsa-miR-338-3p, AMBIONPM10716) or pre-miRNA (has-miR-181b-3p, AMBIONPM20327) in HEK 293T cells with Lipofectamine 2000 (Invitrogen) and the luciferase assay was performed with the Dual-Luciferase Reporter Assay System (Promega). Luminescence was measured with the "Dual Glow" protocol of the GloMax MULTI Detection System (Promega). The luciferase signal obtained from Renilla was normalized against Firefly luciferase intraplasmid control. The USP7 sensor vector (containing the single miR-338-3p and miR-181b MRE) was obtained by annealing the following oligonucleotides:

USP7SENSOR\_WT\_338-3p\_FW:

tcgagCCTGTATATTGCCTTTTTGCTGGAAAAagcttgc

USP7SENSOR\_WT\_338-3p\_RV:

ggcc gcaagcttTTTTCCAGCAAAAAGGCAATATA  
CAGGc

USP7SENSOR\_WT\_181b\_FW:

tcgagTATAAAAATTATAATTCAGTGAGcatatggc

USP7SENSOR\_WT\_181b\_RV:

ggccgcatatgCTCACTGAATTATAATTTTTATAc

The same procedure was used to generate the mutated sensor using the following oligonucleotides:

USP7SENSOR\_MUT\_338-3p\_FW:

tcgagCCTGTATATTGCCTTTTTCTAC  
TTCAAAAagcttgc

USP7SENSOR\_MUT\_338-3p\_RV:

gg ccgcaagcttTTTGAAGTAGAAAAGGCA  
ATATACAGGc

USP7SENSOR\_MUT\_181b\_FW:

tcgagTATAAAAATTATAATGACTGTCGcatatggc

USP7SENSOR\_MUT\_181b\_RV:

ggccgcatatgCGACAGTCATTATAATTTTTATAc

### Antibodies and inhibitors

PTEN (#9188S), Phospho-Serine (#9631S), GAPDH (#5174), Cleaved Caspase-3 (#9661), NOXA (#14766), BAX (#2772), PUMA (#4976) and HSP90 (#4874) were from Cell Signaling Technologies; PTEN (#sc133197), CK2 (#sc12738), Laminin (#sc-6216), USP7 (#sc30164), P21(#sc817), MDM2 (#sc965) were from Santa Cruz; Anti-Ubiquitin was from BD Pharmingen (#550944); GFP (A6455) was from Invitrogen; Tubulin

(#T5201), Actin (#A5060) were from Sigma-Aldrich. HMG14 was from Abcam (#ab5212); pSer18 USP7 (#ABC225) was from Millipore. USP7 inhibitor (P5091), Idelalisib (CAL-101, GS-1101) and CK2 inhibitor (TBB) were from Selleckchem and Sigma-Aldrich, respectively.

### Cell lysis, western blot assay and immunoprecipitation

For cytosol/nuclear fractionation cell pellets were resuspended in hypotonic lysis buffer (10 mM Hepes pH 7.9, 10 mM KCl, 0.1 mM EDTA pH 8.0, protease inhibitors and phosphatase inhibitors) and incubated on ice for 20 minutes. After the addition of NP40, samples were centrifuged at 1200 $\times$ g for 5 minutes and cytosolic extracts were recovered. Nuclear pellets were resuspended in nuclear extraction buffer (20 mM Hepes pH 7.9, 0.4M NaCl, 1 mM EDTA pH 8.0, protease and phosphatase inhibitors). The lysates were subjected to alternative vortex mixing and ice-cooling, and after centrifugation the nuclear extracts were collected. Immunoprecipitation was performed using whole-cell lysates. Proteins were extracted with lysis buffer containing 150 mM NaCl, 1 mM EDTA, 50 mM Hepes (pH 7.5), 1% Triton X-100 and 10% glycerol. Then lysates were incubated with antibodies overnight at 4°C on a rotator. Protein A/G-PLUS-Agarose beads (Santa Cruz #2003) were added and incubated for 2 hours at 4°C with rotation. Beads bound with immunoreactive complexes were washed four times with cold lysis buffer. Immunoprecipitated complexes were boiled for 5 min and subsequently ran using SDS-PAGE on 8% or 6% gels and transferred onto nitrocellulose filters. Immunoblots were then probed overnight at 4°C with specific antibodies in PBS-0,1% tween-1% BSA and protein detection was performed by using peroxidase-conjugated secondary antibodies and chemiluminescence reagent (BIORAD, #170-5060). A similar protein running and transfer procedure was used for Western blotting.

### Kinase assay

*In vitro* kinase assay was performed with immunoprecipitated CK2 kinase and purified His-GST-USP7 (Invitrogen, #11681-H20BL-50), in basal conditions or in presence of CK2 inhibitor TBB (60  $\mu$ M). After 30 minutes at 37°C, reaction was stopped at 95°C and Western Blot was performed.

### Gene expression analysis

RNA was extracted from cells using TRIzol (Invitrogen). 1  $\mu$ g of total RNA was used for reverse transcription. Real-time PCR was performed with iQ SYBR Green (Bio-Rad). Primers used were:

hUSP7\_TOT\_FW:  
5'-CGCTGGGGAACATGGCTTAC-3'  
hUSP7\_TOT\_RV:  
5'-TTGGTCCGTCTGAGGGTTCAT-3'  
hUSP7\_ISO1\_FW:5'-CCGAGGACATGGAGATG  
GAAG-3'  
hUSP7\_ISO1\_RV: 5'-CGCCAACCTGGTGTCAT  
CCTC-3'  
hUSP7\_ISO3\_FW:5'-TGCCAAAAGTTCAGCCT  
CCAT-3'  
hUSP7\_ISO3\_RV: 5'-GGCTAAGGACCGACT  
CACTCA-3'  
hHuPO FW: 5'-GCTTCCTGGAGGGTGTCC-3'  
hHuPO RV: 5'-GGACTCGTTTGTACCCGTTG-3'  
Real-time PCR parameters were: cycle 1, 95°C-  
3 minutes; cycle 2, 95°C-15 seconds, 60°C-30 seconds  
for 40 cycles. For p21 quantification specific assays  
with on-demand primer/probe kits (Hs00355782\_m1 for  
p21) (Applied Biosystems, Foster City, CA, USA) were  
conducted according to the manufacturer's instructions.  
The 2- $\Delta\Delta$ CT method was used to analyze the data. hHuPO  
was used to normalize the results.

### Gene and miRNA expression data analysis

Expression analysis of *USP7* was assessed in a panel of 217 CLL relative to 12 control samples available at GEO (GSE51528) [35]. Samples were assayed on Affymetrix Human Gene 1.0 ST and have been normalized by the RMA algorithm. Differential Expression analysis has been performed using GEO2R tool. The correlation between the gene *USP7* and its putative targeting miRNAs was evaluated on 210 matching samples. miRNAs were assayed on Agilent-019118 Human miRNA Microarray 2.0 G4470B available at GEO website (GSE51527) [35]. A log<sub>2</sub> transformation has been applied to the miRNAs expression levels. The Pearson coefficient has been used to evaluate the correlation between the *USP7* gene and miR-338-3p or miR181b.

### Immunofluorescence and immunohistochemistry

Immunofluorescence was performed as previously described [20]. Immunohistochemistry experiments were performed on formalin-fixed, paraffin-embedded tissues from  $n = 5$  patients, as previously reported [60].

### Cell proliferation assay, cell-cycle analysis and assessment of apoptosis

For proliferation, cells were seeded in 96-well plates at a density of  $1.5 \times 10^3$  cells/well. Proliferation was evaluated by CellTiter-Glo (Promega) following the manufacturer's instructions. Cell-cycle analysis and apoptosis were performed as previously described [61].

### Anchorage-independent cell-growth assay

Cells were suspended in 0.45% type VII low-melting agarose in 10% IMDM at a density of  $5 \times 10^3$  cells/well and plated on a layer of 0.9% type VII low-melting agarose in 10% IMDM in 6-well plates, then cultured at 37°C with 5% CO<sub>2</sub>. After 2 weeks, colonies were counted and images were acquired at 5x magnification.

### Statistical analysis

Two-sided Student's *t*-test or two-way ANOVA with Bonferroni post-test were calculated using GraphPad Prism v5.0d (GraphPad Software). *P*-values < 0.05 were considered statistically significant. \**P* < 0.05; \*\**P* < 0.01; \*\*\**P* < 0.001; \*\*\*\**P* < 0.0001. All mean values ( $\pm$  SEM) are from 3 independent experiments.

### Author contributions

GC, CP, SC performed experiments; GP and DT provided patient samples and critical analyses; PPP provided reagents and critical analyses; MB, AG and GS contribute to results' analysis and manuscript review; R.T., D.M., M.F.L. contributed to the identification of *USP7* miRNAs; M.V. and U.F. performed IHC; GC, DT and AM designed the research and coordinated the study; DT, GC and AM wrote the manuscript. The facility of the University of Torino, Genobitous, performed all the bioinformatic analyses regarding the identification of miR-338-3p and miR-181b-3p and the anticorrelation with *USP7* (as shown in Supplementary Figure S2) and the characterization of *USP7* mRNA levels in Figure 1F.

### ACKNOWLEDGMENTS

We thank all members of the Internal Medicine-Hematology division at the San Luigi Hospital, Orbassano - Italy, and Genobitous, a facility of the University of Torino for Bioinformatic analyses.

### CONFLICTS OF INTEREST

The authors declare that they have no conflict of interest.

### GRANT SUPPORT

This project has been funded by the Italian Ministero della Salute, Progetto Giovani Ricercatori, code GR-2010-2312984 and GR-2011-02351167 to A.M., the AIRC-Start-Up Grant 2014-15405 to R.T. and AIRC (IG 15880 AIRC 2014) to M.B.

## REFERENCES

1. Nabhan C, Rosen ST. Chronic lymphocytic leukemia: a clinical review. *JAMA*. 2014; 312: 2265-76. doi: 10.1001/jama.2014.14553.
2. Gruber M, Wu CJ. Evolving understanding of the CLL genome. *Semin Hematol*. 2014; 51: 177-87. doi: 10.1053/j.seminhematol.2014.05.004.
3. Delgado J, Baumann T, Santacruz R, Montserrat E. New treatment options for chronic lymphocytic leukemia. *Expert Opin Pharmacother*. 2014; 15: 823-32. doi: 10.1517/14656566.2014.891017.
4. Rossi D, Ciardullo C, Spina V, Gaidano G. Molecular bases of chronic lymphocytic leukemia in light of new treatments. *Immunol Lett*. 2013; 155: 51-5. doi: 10.1016/j.imlet.2013.09.010.
5. Gaidano G, Foà R, Dalla-Favera R. Molecular pathogenesis of chronic lymphocytic leukemia. *J Clin Invest*. 2012; 122: 3432-8. doi: 10.1172/JCI64101.
6. Zenz T, Mertens D, Küppers R, Döhner H, Stilgenbauer S. From pathogenesis to treatment of chronic lymphocytic leukaemia. *Nat Rev Cancer*. 2010; 10: 37-50. doi: 10.1038/nrc2764.
7. Baliakas P, Hadzidimitriou A, Sutton LA, Rossi D, Minga E, Villamor N, Larrayoz M, Kminkova J, Agathangelidis A, Davis Z, Tausch E, Stalika E, Kantorova B, et al. Recurrent mutations refine prognosis in chronic lymphocytic leukemia. *Leukemia*. 2015; 29: 329-36. doi: 10.1038/leu.2014.196.
8. Zent CS, Burack WR. Mutations in chronic lymphocytic leukemia and how they affect therapy choice: focus on NOTCH1, SF3B1, and TP53. *Hematol Educ Program Am Soc Hematol Am Soc Hematol Educ Program*. 2014; 2014: 119-24. doi: 10.1182/asheducation-2014.1.119.
9. Wilson WH. Progress in Chronic Lymphocytic Leukemia with Targeted Therapy. *N Engl J Med*. 2016; 374: 386-8. doi: 10.1056/NEJMe1515235.
10. Chang JE, Kahl BS. PI3-kinase inhibitors in chronic lymphocytic leukemia. *Curr Hematol Malig Rep*. 2014; 9: 33-43. doi: 10.1007/s11899-013-0189-7.
11. Xia B, Qu F, Yuan T, Zhang Y. Targeting Bruton's tyrosine kinase signaling as an emerging therapeutic agent of B-cell malignancies. *Oncol Lett*. 2015; 10: 3339-44. doi: 10.3892/ol.2015.3802.
12. Byrd JC, Harrington B, O'Brien S, Jones JA, Schuh A, Devereux S, Chaves J, Wierda WG, Awan FT, Brown JR, Hillmen P, Stephens DM, Ghia P, et al. Acalabrutinib (ACP-196) in Relapsed Chronic Lymphocytic Leukemia. *N Engl J Med*. 2016; 374: 323-32. doi: 10.1056/NEJMoa1509981.
13. Souers AJ, Levenson JD, Boghaert ER, Ackler SL, Catron ND, Chen J, Dayton BD, Ding H, Enschede SH, Fairbrother WJ, Huang DCS, Hymowitz SG, Jin S, et al. ABT-199, a potent and selective BCL-2 inhibitor, achieves antitumor activity while sparing platelets. *Nat Med*. 2013; 19: 202-8. doi: 10.1038/nm.3048.
14. Roberts AW, Davids MS, Pagel JM, Kahl BS, Puvvada SD, Gerecitano JF, Kipps TJ, Anderson MA, Brown JR, Gressick L, Wong S, Dunbar M, Zhu M, et al. Targeting BCL2 with Venetoclax in Relapsed Chronic Lymphocytic Leukemia. *N Engl J Med*. 2016; 374: 311-22. doi: 10.1056/NEJMoa1513257.
15. Furman RR, Sharman JP, Coutre SE, Cheson BD, Pagel JM, Hillmen P, Barrientos JC, Zelenetz AD, Kipps TJ, Flinn I, Ghia P, Eradat H, Ervin T, et al. Idelalisib and rituximab in relapsed chronic lymphocytic leukemia. *N Engl J Med*. 2014; 370: 997-1007. doi: 10.1056/NEJMoa1315226.
16. Byrd JC, Brown JR, O'Brien S, Barrientos JC, Kay NE, Reddy NM, Coutre S, Tam CS, Mulligan SP, Jaeger U, Devereux S, Barr PM, Furman RR, et al. Ibrutinib *versus* ofatumumab in previously treated chronic lymphoid leukemia. *N Engl J Med*. 2014; 371: 213-23. doi: 10.1056/NEJMoa1400376.
17. Chauhan D, Tian Z, Nicholson B, Kumar KGS, Zhou B, Carrasco R, McDermott JL, Leach CA, Fulciniti M, Kodrasov MP, Weinstock J, Kingsbury WD, Hideshima T, et al. A small molecule inhibitor of ubiquitin-specific protease-7 induces apoptosis in multiple myeloma cells and overcomes bortezomib resistance. *Cancer Cell*. 2012; 22: 345-58. doi: 10.1016/j.ccr.2012.08.007.
18. Cummins JM, Vogelstein B. HAUSP is required for p53 destabilization. *Cell Cycle Georget Tex*. 2004; 3: 689-92.
19. Song MS, Salmena L, Carracedo A, Egia A, Lo-Coco F, Teruya-Feldstein J, Pandolfi PP. The deubiquitylation and localization of PTEN are regulated by a HAUSP-PML network. *Nature*. 2008; 455: 813-7. doi: 10.1038/nature07290.
20. Morotti A, Panuzzo C, Crivellaro S, Pergolizzi B, Familiari U, Berger AH, Saglio G, Pandolfi PP. BCR-ABL disrupts PTEN nuclear-cytoplasmic shuttling through phosphorylation-dependent activation of HAUSP. *Leukemia*. 2014; 28: 1326-33. doi: 10.1038/leu.2013.370.
21. van der Horst A, de Vries-Smits AMM, Brenkman AB, van Triest MH, van den Broek N, Colland F, Maurice MM, Burgering BMT. FOXO4 transcriptional activity is regulated by monoubiquitination and USP7/HAUSP. *Nat Cell Biol*. 2006; 8: 1064-73. doi: 10.1038/ncb1469.
22. Wickremasinghe RG, Prentice AG, Steele AJ. p53 and Notch signaling in chronic lymphocytic leukemia: clues to identifying novel therapeutic strategies. *Leukemia*. 2011; 25: 1400-7. doi: 10.1038/leu.2011.103.
23. Leupin N, Cenni B, Novak U, Hügli B, Graber HU, Tobler A, Fey MF. Disparate expression of the PTEN gene: a novel finding in B-cell chronic lymphocytic leukaemia (B-CLL). *Br J Haematol*. 2003; 121: 97-100.
24. Zou ZJ, Zhang R, Fan L, Wang L, Fang C, Zhang LN, Yang S, Li YY, Li JY, Xu W. Low expression level of phosphatase and tensin homolog deleted on chromosome ten predicts poor prognosis in chronic lymphocytic

- leukemia. *Leuk Lymphoma*. 2013; 54: 1159-64. doi: 10.3109/10428194.2012.733880.
25. Zou Z-J, Fan L, Wang L, Xu J, Zhang R, Tian T, Li J-Y, Xu W. miR-26a and miR-214 down-regulate expression of the PTEN gene in chronic lymphocytic leukemia, but not PTEN mutation or promoter methylation. *Oncotarget*. 2015; 6: 1276-85. doi: 10.18632/oncotarget.2626.
  26. Shehata M, Schnabl S, Demirtas D, Hilgarth M, Hubmann R, Ponath E, Badrnya S, Lehner C, Hoelbl A, Duechler M, Gaiger A, Zielinski C, Schwarzmeier JD, et al. Reconstitution of PTEN activity by CK2 inhibitors and interference with the PI3-K/Akt cascade counteract the antiapoptotic effect of human stromal cells in chronic lymphocytic leukemia. *Blood*. 2010; 116: 2513-21. doi: 10.1182/blood-2009-10-248054.
  27. Martins LR, Lúcio P, Silva MC, Anderes KL, Gameiro P, Silva MG, Barata JT. Targeting CK2 overexpression and hyperactivation as a novel therapeutic tool in chronic lymphocytic leukemia. *Blood*. 2010; 116: 2724-31. doi: 10.1182/blood-2010-04-277947.
  28. Best OG, Mulligan SP. The phosphoinositide 3-kinase pathway in chronic lymphocytic leukemia: evidence for phosphatase and tensin homolog deletion on chromosome 10 deregulation. *Leuk Lymphoma*. 2013; 54: 1123-4. doi: 10.3109/10428194.2012.746685.
  29. Martins LR, Lúcio P, Silva MC, Gameiro P, Silva MG, Barata JT. On CK2 regulation of chronic lymphocytic leukemia cell viability. *Mol Cell Biochem*. 2011; 356: 51-5. doi: 10.1007/s11010-011-0947-6.
  30. Martins LR, Perera Y, Lúcio P, Silva MG, Perea SE, Barata JT. Targeting chronic lymphocytic leukemia using CIGB-300, a clinical-stage CK2-specific cell-permeable peptide inhibitor. *Oncotarget*. 2014; 5: 258-63. doi: 10.18632/oncotarget.1513.
  31. Marchenko ND, Hanel W, Li D, Becker K, Reich N, Moll UM. Stress-mediated nuclear stabilization of p53 is regulated by ubiquitination and importin-alpha3 binding. *Cell Death Differ*. 2010; 17: 255-67. doi: 10.1038/cdd.2009.173.
  32. Becker K, Marchenko ND, Maurice M, Moll UM. Hyperubiquitylation of wild-type p53 contributes to cytoplasmic sequestration in neuroblastoma. *Cell Death Differ*. 2007; 14: 1350-60. doi: 10.1038/sj.cdd.4402126.
  33. Khoronenkova SV, Dianova II, Ternette N, Kessler BM, Parsons JL, Dianov GL. ATM-dependent downregulation of USP7/HAUSP by PPM1G activates p53 response to DNA damage. *Mol Cell*. 2012; 45: 801-13. doi: 10.1016/j.molcel.2012.01.021.
  34. Morotti A, Panuzzo C, Crivellaro S, Carrà G, Guerrasio A, Saglio G. HAUSP compartmentalization in chronic myeloid leukemia. *Eur J Haematol*. 2015; 94: 318-21. doi: 10.1111/ejh.12422.
  35. Maura F, Cutrona G, Mosca L, Matis S, Lionetti M, Fabris S, Agnelli L, Colombo M, Massucco C, Ferracin M, Zagatti B, Reverberi D, Gentile M, et al. Association between gene and miRNA expression profiles and stereotyped subset #4 B-cell receptor in chronic lymphocytic leukemia. *Leuk Lymphoma*. 2015; 56: 3150-8. doi: 10.3109/10428194.2015.1028051.
  36. Giza DE, Calin GA. microRNA and Chronic Lymphocytic Leukemia. *Adv Exp Med Biol*. 2015; 889: 23-40. doi: 10.1007/978-3-319-23730-5\_2.
  37. Pekarsky Y, Santanam U, Cimmino A, Palamarchuk A, Efanov A, Maximov V, Volinia S, Alder H, Liu CG, Rassenti L, Calin GA, Hagan JP, Kipps T, et al. Tc11 expression in chronic lymphocytic leukemia is regulated by miR-29 and miR-181. *Cancer Res*. 2006; 66: 11590-3. doi: 10.1158/0008-5472.CAN-06-3613.
  38. Balatti V, Pekarky Y, Rizzotto L, Croce CM. miR deregulation in CLL. *Adv Exp Med Biol*. 2013; 792: 309-25. doi: 10.1007/978-1-4614-8051-8\_14.
  39. Silva A, Yunes JA, Cardoso BA, Martins LR, Jotta PY, Abecasis M, Nowill AE, Leslie NR, Cardoso AA, Barata JT. PTEN posttranslational inactivation and hyperactivation of the PI3K/Akt pathway sustain primary T cell leukemia viability. *J Clin Invest*. 2008; 118: 3762-74. doi: 10.1172/JCI34616.
  40. Prins RC, Burke RT, Tyner JW, Druker BJ, Loriaux MM, Spurgeon SE. CX-4945, a selective inhibitor of casein kinase-2 (CK2), exhibits anti-tumor activity in hematologic malignancies including enhanced activity in chronic lymphocytic leukemia when combined with fludarabine and inhibitors of the B-cell receptor pathway. *Leukemia*. 2013; 27: 2094-6. doi: 10.1038/leu.2013.228.
  41. Piazza F, Manni S, Ruzzene M, Pinna LA, Gurrieri C, Semenzato G. Protein kinase CK2 in hematologic malignancies: reliance on a pivotal cell survival regulator by oncogenic signaling pathways. *Leukemia*. 2012; 26: 1174-9. doi: 10.1038/leu.2011.385.
  42. Martins LR, Lúcio P, Melão A, Antunes I, Cardoso BA, Stansfield R, Bertilaccio MTS, Ghia P, Drygin D, Silva MG, Barata JT. Activity of the clinical-stage CK2-specific inhibitor CX-4945 against chronic lymphocytic leukemia. *Leukemia*. 2014; 28: 179-82. doi: 10.1038/leu.2013.232.
  43. Martins LR, Perera Y, Lúcio P, Silva MG, Perea SE, Barata JT. Targeting chronic lymphocytic leukemia using CIGB-300, a clinical-stage CK2-specific cell-permeable peptide inhibitor. *Oncotarget*. 2014; 5: 258-63. doi: 10.18632/oncotarget.1513.
  44. Lee G, Oh TI, Um KB, Yoon H, Son J, Kim BM, Kim H-, Kim H, Kim YJ, Lee CS, Lim JH. Small-molecule inhibitors of USP7 induce apoptosis through oxidative and endoplasmic reticulum stress in cancer cells. *Biochem Biophys Res Commun*. 2016; 470: 181-6. doi: 10.1016/j.bbrc.2016.01.021.
  45. Fan YH, Cheng J, Vasudevan SA, Dou J, Zhang H, Patel RH, Ma IT, Rojas Y, Zhao Y, Yu Y, Zhang H, Shohet JM, Nuchtern JG, et al. USP7 inhibitor P22077 inhibits neuroblastoma growth via inducing p53-mediated apoptosis.

- Cell Death Dis. 2013; 4: e867. doi: 10.1038/cddis.2013.400.
46. Reverdy C, Conrath S, Lopez R, Planquette C, Atmanene C, Collura V, Harpon J, Battaglia V, Vivat V, Sippl W, Colland F. Discovery of specific inhibitors of human USP7/HAUSP deubiquitinating enzyme. *Chem Biol.* 2012; 19: 467-77. doi: 10.1016/j.chembiol.2012.02.007.
  47. Menard R, Sulea T. Selective inhibition of USP7. *Chem Biol.* 2012; 19: 437-8. doi: 10.1016/j.chembiol.2012.04.001.
  48. Colland F. The therapeutic potential of deubiquitinating enzyme inhibitors. *Biochem Soc Trans.* 2010; 38: 137-43. doi: 10.1042/BST0380137.
  49. Colland F, Formstecher E, Jacq X, Reverdy C, Planquette C, Conrath S, Trouplin V, Bianchi J, Aushev VN, Camonis J, Calabrese A, Borg-Capra C, Sippl W, et al. Small-molecule inhibitor of USP7/HAUSP ubiquitin protease stabilizes and activates p53 in cells. *Mol Cancer Ther.* 2009; 8: 2286-95. doi: 10.1158/1535-7163.MCT-09-0097.
  50. Popovic D, Vucic D, Dikic I. Ubiquitination in disease pathogenesis and treatment. *Nat Med.* 2014; 20: 1242-53. doi: 10.1038/nm.3739.
  51. Fruman DA, Cantley LC. Idelalisib—a PI3K $\delta$  inhibitor for B-cell cancers. *N Engl J Med.* 2014; 370: 1061-2. doi: 10.1056/NEJMe1400055.
  52. van der Horst A, de Vries-Smits AMM, Brenkman AB, van Triest MH, van den Broek N, Colland F, Maurice MM, Burgering BMT. FOXO4 transcriptional activity is regulated by monoubiquitination and USP7/HAUSP. *Nat Cell Biol.* 2006; 8: 1064-73. doi: 10.1038/ncb1469.
  53. Song MS, Salmena L, Pandolfi PP. The functions and regulation of the PTEN tumour suppressor. *Nat Rev Mol Cell Biol.* 2012; 13: 283-96. doi: 10.1038/nrm3330.
  54. Song MS, Carracedo A, Salmena L, Song SJ, Egia A, Malumbres M, Pandolfi PP. Nuclear PTEN regulates the APC-CDH1 tumor-suppressive complex in a phosphatase-independent manner. *Cell.* 2011; 144: 187-99. doi: 10.1016/j.cell.2010.12.020.
  55. Shen WH, Balajee AS, Wang J, Wu H, Eng C, Pandolfi PP, Yin Y. Essential role for nuclear PTEN in maintaining chromosomal integrity. *Cell.* 2007; 128: 157-70. doi: 10.1016/j.cell.2006.11.042.
  56. Bassi C, Ho J, Srikumar T, Dowling RJO, Gorrini C, Miller SJ, Mak TW, Neel BG, Raught B, Stambolic V. Nuclear PTEN controls DNA repair and sensitivity to genotoxic stress. *Science.* 2013; 341: 395-9. doi: 10.1126/science.1236188.
  57. Rossi D, Khiabani H, Spina V, Ciardullo C, Brusca A, Famà R, Rasi S, Monti S, Deambrogi C, De Paoli L, Wang J, Gattei V, Guarini A, et al. Clinical impact of small TP53 mutated subclones in chronic lymphocytic leukemia. *Blood.* 2014; 123: 2139-47. doi: 10.1182/blood-2013-11-539726.
  58. Bosco R, Rabusin M, Voltan R, Celeghini C, Corallini F, Capitani S, Secchiero P. Anti-leukemic activity of dasatinib in both p53(wild-type) and p53(mutated) B malignant cells. *Invest New Drugs.* 2012; 30: 417-22. doi: 10.1007/s10637-010-9564-6.
  59. Trotman LC, Wang X, Alimonti A, Chen Z, Teruya-Feldstein J, Yang H, Pavletich NP, Carver BS, Cordon-Cardo C, Erdjument-Bromage H, Tempst P, Chi S-G, Kim H-J, et al. Ubiquitination regulates PTEN nuclear import and tumor suppression. *Cell.* 2007; 128: 141-56. doi: 10.1016/j.cell.2006.11.040.
  60. Di Savino A, Panuzzo C, Rocca S, Familiari U, Piazza R, Crivellaro S, Carrà G, Ferretti R, Fusella F, Giugliano E, Camporeale A, Franco I, Miniscalco B, et al. Morgana acts as an oncosuppressor in chronic myeloid leukemia. *Blood.* 2015; 125: 2245-53. doi: 10.1182/blood-2014-05-575001.
  61. Taulli R, Bersani F, Foglizzo V, Linari A, Vigna E, Ladanyi M, Tuschl T, Ponzetto C. The muscle-specific microRNA miR-206 blocks human rhabdomyosarcoma growth in xenotransplanted mice by promoting myogenic differentiation. *J Clin Invest.* 2009; 119: 2366-78. doi: 10.1172/JCI38075.
